## RESEARCH ARTICLE

# Comparative karyotypic study of fifteen cyprinids (Cyprinidae, Cyprininae) species. An insight into the chromosomal evolution of the tribe Systomini

Phichaya Buasriyot<sup>1</sup>, Francisco de Menezes Cavalcante Sassi<sup>2</sup>, Nuttasuda Donbudit<sup>1</sup>, Weerayuth Supiwong<sup>3</sup>, Sarawut Kaewsri<sup>4</sup>, Sarun Jumrusthanasan<sup>4</sup>, Kriengkrai Seetapan<sup>5</sup>, Krit Pinthong<sup>6</sup>, Alongklod Tanomtong<sup>1</sup>, Klodthida Yanukun<sup>1</sup>, Nawarat Muanglen<sup>7</sup>, Thomas Liehr<sup>8</sup>, Marcelo de Bello Cioffi<sup>2\*</sup>

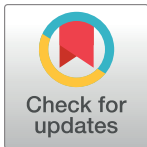

**1** Animals Cytogenetics Research Group, Department of Biology, Faculty of Science, Khon Kaen University, Muang, Khon Kaen, Thailand, **2** Departamento de Genética e Evolução, Universidade Federal de São Carlos (UFSCar), São Carlos, SP, Brazil, **3** Faculty of Interdisciplinary Studies, Nong Khai Campus, Khon Kaen University, Muang, Nong Khai, Thailand, **4** Biology Program, Department of Science, Faculty of Science, Buriram Rajabhat University, Muang, Buriram, Thailand, **5** School of Agriculture and Natural Resources, University of Phayao, Muang District, Phayao Province, Thailand, **6** Department of Fundamental Science, Faculty of Science and Technology, Surindra Rajabhat University, Muang, Surin, Thailand, **7** Department Of Fisheries, Faculty of Agricultural Technology, Sakon Nakhon Rajabhat University, Muang, Sakon Nakhon, Thailand, **8** Institute of Human Genetics, University Hospital Jena, Friedrich Schiller University, Jena, Germany

\* [mbcioffi@ufscar.br](mailto:mbcioffi@ufscar.br)

## OPEN ACCESS

**Citation:** Buasriyot P, Sassi FdMC, Donbudit N, Supiwong W, Kaewsri S, Jumrusthanasan S, et al. (2024) Comparative karyotypic study of fifteen cyprinids (Cyprinidae, Cyprininae) species. An insight into the chromosomal evolution of the tribe Systomini. PLoS ONE 19(7): e0305828. <https://doi.org/10.1371/journal.pone.0305828>

**Editor:** Ishtiaq Ahmad, Sher-e-Kashmir University of Agricultural Sciences and Technology of Kashmir, INDIA

**Received:** February 27, 2024

**Accepted:** June 5, 2024

**Published:** July 18, 2024

**Copyright:** © 2024 Buasriyot et al. This is an open access article distributed under the terms of the [Creative Commons Attribution License](https://creativecommons.org/licenses/by/4.0/), which permits unrestricted use, distribution, and reproduction in any medium, provided the original author and source are credited.

**Data Availability Statement:** All relevant data are within the manuscript.

**Funding:** This work was supported by the Thailand Research Fund (TRF) under the Royal Golden Jubilee (RGJ) Ph.D. Program grant No. PHD/0169/2560 and the Thailand science research and innovation fund and the University of Phayao (Grant No. FF66-UoE003). MBC and TL were supported by Alexander von Humboldt Foundation

## Abstract

The family Cyprinidae is the largest freshwater fish group with 377 genera and over 3,000 described species. However, this group of fish has very limited cytogenetics and advanced molecular cytogenetics information. Therefore, in this study the karyotypes and other chromosomal characteristics of 15 species in the tribe Systomini (Cyprininae) were examined using Ag-NOR staining along with fluorescence in situ hybridization (5S and 18S rDNA). All species share a similar karyotype ( $2n = 50$ ;  $NF = 88-100$ ) in both sexes and no differentiated sex chromosome was observed. Chromosomes bearing NOR sites ranged from one to four pairs among the species, mostly mapped adjacent to telomeres in the short arms of distinct pairs in all analyzed species. This difference indicates an extensive rearrangement of chromosomes including genomic differences. The use of the 5S and 18S rDNA probe confirmed the Ag-NOR sites interstitially located in the telomeric regions of distinct chromosomes, characterizing an interspecies variation of these sites. In most of its analyzed species, the signals of 18S rDNA probe corresponded to the Ag-NOR regions, except in *Barbonymus altus*, *B. gonionotus*, *B. schwanenfeldii* and *Puntius brevis* having these signals on the same as Ag-NOR regions and other sites.

(Research Group Linkage Programme). We acknowledge support by the German Research Foundation Projekt-Nr. 512648189 and the Open Access Publication Fund of the Thueringer Universitaets- und Landesbibliothek Jena. the funder had no role in the study design, data collection and analysis, decision to publish, or preparation of the manuscript.

**Competing interests:** The authors have declared that no competing interests exist.

## Introduction

Cyprinidae is the largest and most diverse fish family with about 3,000 species and 370 genera naturally distributed throughout most parts of the world [1]. More than 1,500 cyprinid species have evolved highly adapted body shapes and mouth structures, allowing them to live in almost any habitats throughout their range [2]. This group's basic traits include that it only has teeth in its throat, a single dorsal fin, pelvic fins in an abdominal position, pectoral fins low on the side, and absence of adipose fin [3]. The scales are cycloid and usually absent in the head, whereas the lateral-line system is typically well developed. The size and shape of the arch and teeth are closely tied to the diet of the species. In most cyprinids the lips are usually narrow, but they can be enlarged, sucker-like, or even lobed. Most cyprinids have a typical minnow-like body shape and are sexually dimorphic [4]. In Thailand's aquatic ecosystems, 36 to 39% of all fish species are cyprinids [5].

Cytogenetics is an important tool for the detection of biodiversity [6, 7]. Many cytogenetic studies have been performed to understand the evolution of the macro and micro karyotype structures of different fish groups. Together, classical and molecular cytogenetic techniques have contributed significantly to knowledge of this karyotypic diversity [8]. Classical chromosomal banding techniques include in fish the C-banding and silver nitrate staining to highlight nucleolar organizer regions (Ag-NORs) [8]. These methods can detect chromosomal rearrangements, structural and/or numeric polymorphisms, sex chromosome systems, and populational variations [7, 9]. Although these techniques provide a good understanding of the fish chromosomal diversity, conventional karyotyping is usually limited to detecting the DNA rearrangements greater than 5 Mb. The fluorescence *in situ* hybridization (FISH) technique strongly improved the transition from classical to molecular cytogenetics by allowing the identification of DNA sequences ranging in size from 100kb to 1Mb in the studied cytological material [10]. As a result, this technique enables for the mapping of specific nucleotide sequences in within chromosomes [11]. In the same way, the position of NORs in fish has been widely documented, and polymorphisms within and among them have been discovered [12–14]. These experiments used silver nitrate staining (Ag-NOR), which has recently been verified or reinvestigated in light of FISH with 18S rDNA probe [15]. Furthermore, some fish species have the 18S rRNA gene co-located with the 5S rRNA [16, 17], another ribosomal sequence frequently investigated regarding its position on chromosomes.

The study of chromosomes in Cyprinidae reveals that the karyotypic evolution in this family is marked by several polyploidization events occurred independently in many species [18]. A diploid number ranging from  $2n = 42$  in *Acheilognathus gracilis* [19] to  $2n = 446$  in *Diptychus dipogon* [20] is described for cypriniforms, but  $2n = 50$  is the most frequent number and is considered a plesiomorphic trait for the group [21–23]. Differentiated sex chromosomes seem rare, with only one ZZ/ZW case described for *Squalius recurvirostris* [24–26]. Recently, a study combining molecular and classical cytogenetics revealed that the sister tribe Labeonini have a conserved  $2n$  but with extensive structural chromosome rearrangements [27]. Thus, the aim of the present study was to provide the first finer-scale cytogenetic investigation in cyprinids from the Systomini tribe using both by conventional (Giemsa staining and Ag-NOR) and molecular (fluorescence *in situ* hybridization (FISH) with 5S and 18S rDNA probes) methods in 15 species. The results added new informative characters useful in comparative genomics at the chromosomal level and highlighted the inner diversity present among the analyzed species.

## Materials and methods

### Sample collection and mitotic chromosome preparation

Locations of sampling from the river basins in Thailand included the Chao Phraya River Basin (Sing Buri Province (1)) in the central region, the Mekong River Basin (Nong Khai Province (2)), Songkhram River Basin (Bueng Kan (3) and Nakhon Phanom Provinces (4)) Chi River Basin (Maha Sarakham Province (5)) in the northeastern region, Yom River Basin (Phayao Province (6)) in the northern region and Sirindhorn Peat Swamp Forest (To Daeng Peat Swamp Forest) (Narathiwat Province (7)) in the southern region of Thailand (Fig 1). Fifteen cyprinid species including *Amblyrhynchichthys micracanthus*, *Barbonymus altus*, *Barbonymus gonionotus*, *Barbonymus schwanenfeldii*, *Cyclocheilos enoplos*, *Cyclocheilichthys armatus*, *Cyclocheilichthys repasson*, *Desmopuntius hexazona*, *Hampala dispar*, *Hampala macrolepidota*, *Pethia stoliczka*, *Poropuntius laoensis*, *Puntigrus partipentazona*, *Puntius brevis* and *Sikukia stejneri* were analyzed, with the number of individuals and sex compiled in Table 1. Mitotic chromosomes were obtained from the classical air-drying method, with some adaptations as described in previous works [28, 29]. The chromosome was stained with Giemsa's solution pH 6.8 and the Ag-NOR banding was performed following the protocols of Howell and Black (1980) [30]; modified by [29, 31]. All experiments followed the scientific laboratory animal ethical conduct. This process has been approved by the Institutional Animal Care and Use Committee of Khon Kaen University, based on the Ethics of Animal Experimentation of the National Research Council of Thailand, record no. IACUC-KKU-40/64 and by the Royal Golden Jubilee (RGJ) committee under no. PHD/0169/2560 (Thailand).

### FISH analysis

Two probes were mapped using fluorescence in situ hybridization (FISH) in the mitotic metaphases. The 5S rDNA probe consisted of 120 base pairs (bp) of the 5S rRNA-encoding gene and 200 bp of the non-transcribed spacer (NTS) [32]. On other hand, the 18S rDNA probe corresponded to a 1400 bp segment of the 18S rRNA gene [33]. Both 5S and 18S rDNA probes were fluorescence labeled with the Nick-Translation Labeling Kit (Jena Bioscience, Jena, Germany) by Atto488-dUTP (18S rDNA) and Atto550-dUTP (5S rDNA), according to the manufacturer's recommendations.

FISH was performed under high stringency conditions following the protocol of [34]. The chromosome preparations were incubated with RNase (40 µg/mL) for 1.5 h at 37 °C. After denaturation of the chromosomes for 3 min in 70% formamide/2× SSC at 70 °C, spreads were dehydrated in an ethanol series (70, 85, and 100%), for 2 min each. Then, 20 µL of the hybridization mixture (100 ng of each probe, 50% deionized formamide, 10% dextran sulfate) was applied to the slides, and the hybridization was performed overnight at 37 °C in a moist chamber containing 2× SSC. The post-hybridization wash was carried out with 1× SSC for 5 min at 65 °C and a final wash was performed at room temperature in 4× SSC/Tween for 5 min. Finally, the chromosomes were counterstained with DAPI mounted in an antifade solution (Vectashield from Vector laboratories).

### Cytogenetic analysis

Approximately 30 metaphase spreads were analyzed per individual to confirm the diploid chromosome number (2n), karyotype structure, and FISH results. Images were captured using an Axioplan II microscope (Carl Zeiss Jena GmbH, Germany) with CoolSNAP and the images were processed using Image-Pro Plus 4.1 software (Media Cybernetics, Silver Spring, MD,

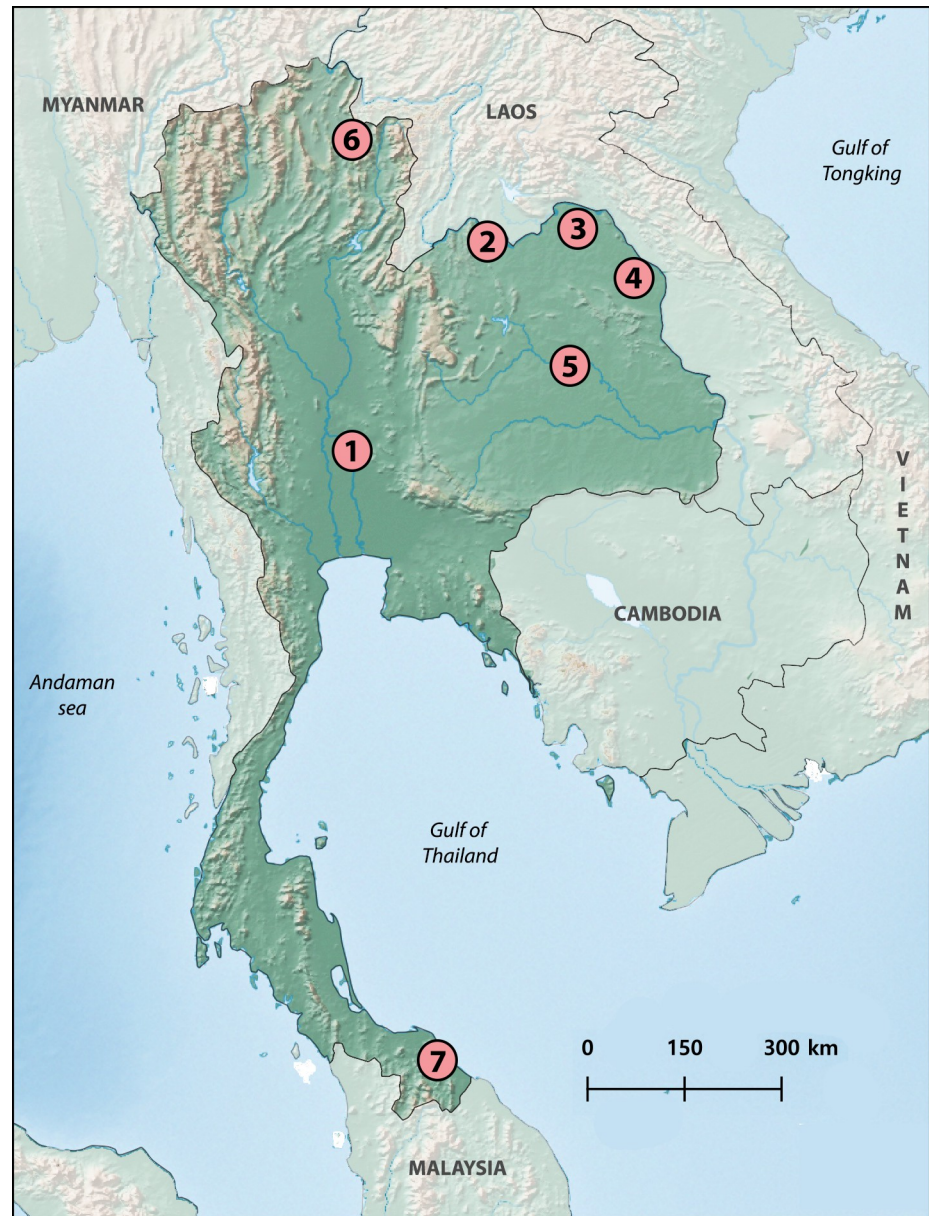

**Fig 1. Thailand map indicating the seven collection sites of the 15 species studied herein.** 1. *Amblyrhynchichthys micracanthus*, *Cyclocheilichthys armatus*, *Cyclocheilichthys repasson*, *Sikukia stejneri*; 2. *Cyclocheilos enoplos*, *Poropuntius laoensis*, *Puntius brevis*; 3. *Hampala macrolepidota*, *Barbonymus altus*, *Barbonymus schwanenfeldii*; 4. *Barbonymus gonionotus*, *Hampala dispar*; 5. *Puntigrus partipentazona*; 6. *Pethia stoliczkana* and 7. *Desmopuntius hexazona*. Map created with Natural Earth on QGIS 3.20. Scale Bar = 300 km.

<https://doi.org/10.1371/journal.pone.0305828.g001>

USA). Chromosomes were classified as metacentric (m), submetacentric (sm), subtelocentric (st), and acrocentric (a) according to their arm length ratios based on [35].

## Results

### Standard karyotype and Ag-NORs analysis

As expected, all 15 investigated species presented a diploid number  $2n = 50$ , with karyotypes composed of metacentric (m) submetacentric (sm) subtelocentric (st), and acrocentric (a)



Table 1. Collection sites and the number of specimens for chromosomal analysis.

| Species                                   | Location                                                                         | No. of specimens |
|-------------------------------------------|----------------------------------------------------------------------------------|------------------|
| 1. <i>Amblyrhynchichthys micracanthus</i> | Chao Phraya River Basin                                                          | 07♀; 09♂         |
|                                           | 14°51'30"N 100°24'42"E Ton Pho, Mueang Sing Buri District, Sing Buri             |                  |
| 2. <i>Barbonymus altus</i>                | Songkhram River Basin                                                            | 11♀; 08♂         |
|                                           | 18°00'20.4"N 103°28'23.6"E                                                       |                  |
|                                           | So Phisai District, Bueng Kan                                                    |                  |
| 3. <i>Barbonymus gonionotus</i>           | Songkhram River Basin                                                            | 06♀; 06♂         |
|                                           | 17°43'12.0"N 104°06'55.9"E Sam Phong, Si Songkhram District, Nakhon Phanom       |                  |
| 4. <i>Barbonymus schwanenfeldii</i>       | Songkhram River Basin                                                            | 10♀; 07♂         |
|                                           | 18°00'20.4"N 103°28'23.6"E                                                       |                  |
|                                           | So Phisai District, Bueng Kan                                                    |                  |
| 5. <i>Cyclocheilos enoplos</i>            | Mekong River Basin                                                               | 12♀; 15♂         |
|                                           | 17°52'42.0"N 102°43'07.1"E Mi Chai, Mueang Nong Khai District, Nong Khai         |                  |
| 6. <i>Cyclocheilichthys armatus</i>       | Chao Phraya River Basin                                                          | 08♀; 11♂         |
|                                           | 14°51'30"N 100°24'42"E                                                           |                  |
|                                           | Ton Pho, Mueang Sing Buri District, Sing Buri                                    |                  |
| 7. <i>Cyclocheilichthys repasson</i>      | Chao Phraya River Basin                                                          | 04♀; 10♂         |
|                                           | 14°51'30"N 100°24'42"E Ton Pho, Mueang Sing Buri District, Sing Buri             |                  |
| 8. <i>Desmopuntius hexazona</i>           | To Daeng Peat Swamp Forest                                                       | 05♀; 06♂         |
|                                           | 6°04'31"N 101°57'45"E                                                            |                  |
|                                           | Puyo, Su-ngai Kolok District, Narathiwat                                         |                  |
| 9. <i>Hampala dispar</i>                  | Songkhram River Basin                                                            | 09♀; 10♂         |
|                                           | 17°43'12.0"N 104°06'55.9"E Sam Phong, Si Songkhram District, Nakhon Phanom       |                  |
| 10. <i>Hampala macrolepidota</i>          | Songkhram River Basin                                                            | 09♀; 09♂         |
|                                           | 18°00'20.4"N 103°28'23.6"E                                                       |                  |
|                                           | So Phisai District, Bueng Kan                                                    |                  |
| 11. <i>Pethia stoliczkana</i>             | Yom River Basin                                                                  | 08♀; 12♂         |
|                                           | 18°54'07.0"N 100°16'30.0"E Chiang Muan, Chiang Muan District, Phayao             |                  |
| 12. <i>Poropuntius laoensis</i>           | Mekong River Basin                                                               | 10♀; 07♂         |
|                                           | 17°52'42.0"N 102°43'07.1"E                                                       |                  |
|                                           | Mi Chai, Mueang Nong Khai District, Nong Khai                                    |                  |
| 13. <i>Puntigrus partipentazona</i>       | Chi River Basin                                                                  | 11♀; 09♂         |
|                                           | 16°13'55.2"N 103°15'59.0"E Tha Khon Yang, Kantharawichai District, Maha Sarakham |                  |
| 14. <i>Puntius brevis</i>                 | Mekong River Basin                                                               | 07♀; 05♂         |
|                                           | 17°52'42.0"N 102°43'07.1"E                                                       |                  |
|                                           | Mi Chai, Mueang Nong Khai District, Nong Khai                                    |                  |
| 15. <i>Sikukia stejnegeri</i>             | Chao Phraya River Basin                                                          | 08♀; 09♂         |
|                                           | 14°51'30"N 100°24'42"E Ton Pho, Mueang Sing Buri District, Sing Buri             |                  |

<https://doi.org/10.1371/journal.pone.0305828.t001>

chromosomes, with the NF ranging 88–100 in both sexes. Two species do not have all chromosome types in their karyotypes, following *D. hexazona* without acrocentric ones and *P. stoliczkana*, which only harbors meta- or submetacentric chromosomes. Commonly, the Ag-NOR positive sites were observed in the telomeric region of the short arm of 1 (e.g., *A. micracanthus*) to 4 chromosome pairs (e.g., *C. repasson*). In all species, no numerical or structural polymorphism between the sexes was observed, thus there was no evidence of differentiated sex chromosomes (Figs 2–4).

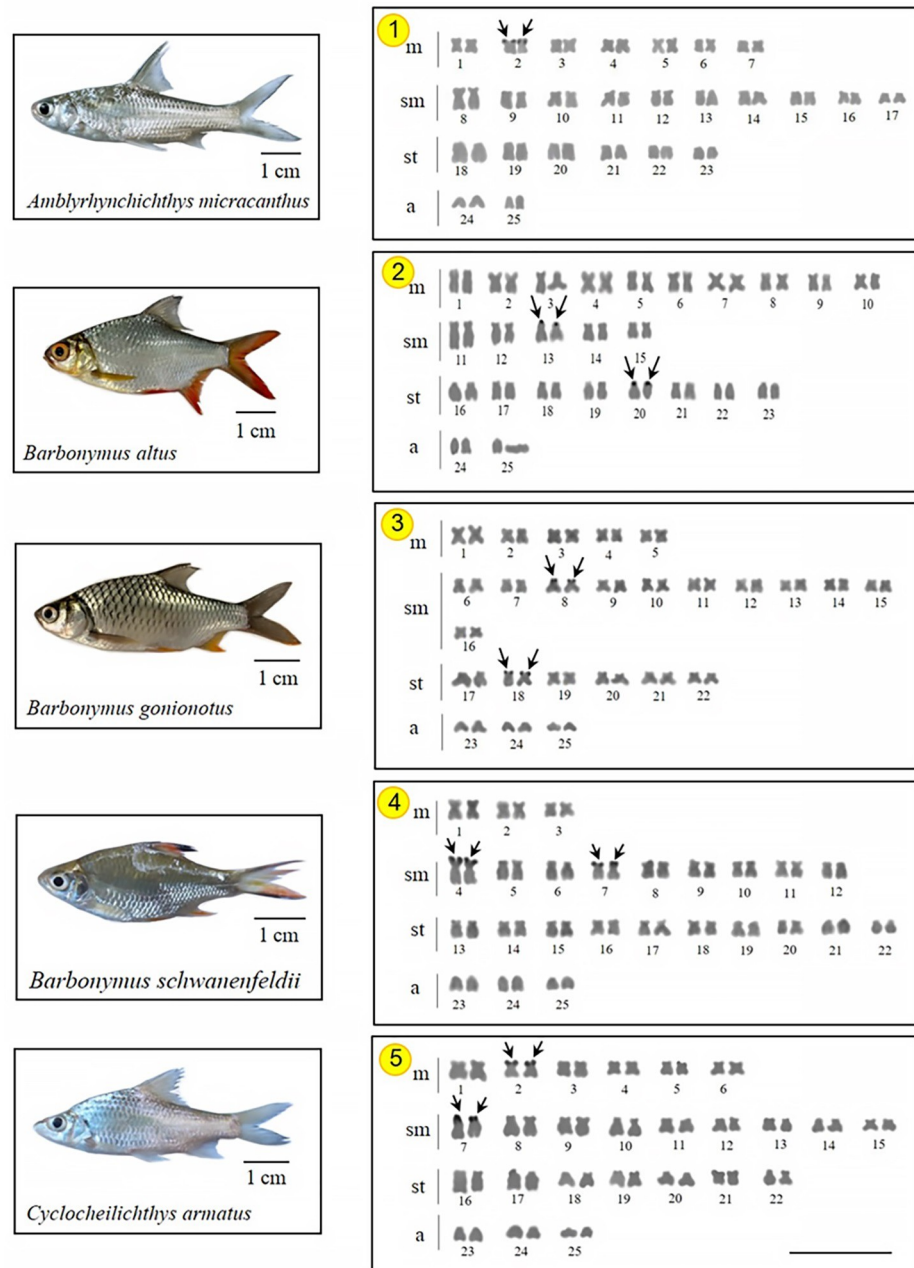

**Fig 2. Karyotypes of five Systomini representatives.** *Amblyrhynchichthys micracanthus* (1); *Barbonymus altus* (2); *Barbonymus gonionotus* (3); *Barbonymus schwanefeldii* (4); and *Cyclocheilichthys armatus* (5) karyotypes arranged from Ag-NOR stained chromosomes. The Arrows indicate NOR-bearing chromosomes. Bar = 5  $\mu$ m.

<https://doi.org/10.1371/journal.pone.0305828.g002>

### Fluorescence in situ hybridization (FISH)-mapping

The existence of major ribosomal sites in these Ag-NOR regions was confirmed by FISH with the 18S rDNA probe. The FISH signals coincided with the Ag-NOR regions (Figs 5–7 and Table 2) in the majority of the species studied, with exception of *Barbonymus altus*, *B. gonionotus*, *B. schwanefeldii*, and *Puntius brevis* which had additional rDNA loci not identified by the classical Ag-NOR. The 18S probe hybridized to only one chromosomal pair in four species: A.

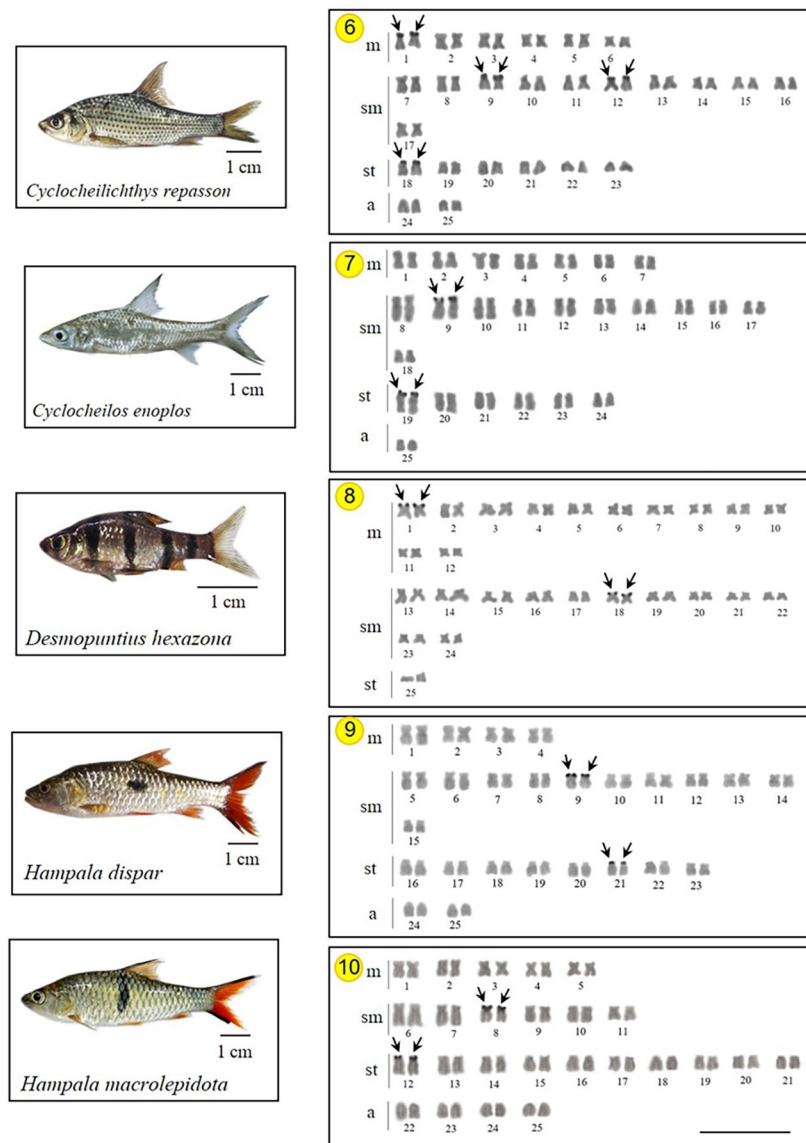

**Fig 3. Karyotypes of five Systomini representatives.** *Cyclocheilichthys repasson* (6); *Cyclocheilos enoplos* (7); *Desmopuntius hexazona* (8); *Hampala dispar* (9); and *Hampala macrolepidota* (10) chromosomes arranged in karyotypes from Ag-NOR stain technique. Arrows indicate NOR-bearing chromosomes. Bar = 5  $\mu$ m.

<https://doi.org/10.1371/journal.pone.0305828.g003>

*micracanthus*, *P. stoliczkana*, *P. partipentazona* and *S. stejnegeri*, on the short arms of the metacentric chromosome pair 2, submetacentric pair 20, metacentric pair 1, and submetacentric pair 6, respectively. Six species demonstrated positive FISH signals on two chromosome pairs, namely *C. enoplos*, *C. armatus*, *D. hexazona*, *H. dispar*, *H. macrolepidota* and *P. laoensis*. Three positive signals were detected in *B. altus* and *B. schwanenfeldii*. Furthermore, up to four pairs were detected in *B. gonionotus*, *C. repasson*, and *P. brevis*. 18S rDNA sites were found in telomeric regions of short arms except for the chromosome pair 21 of *B. altus* whose signal is accumulated in the telomeric region of its long arms. Moreover, a sub-telomeric distribution of 18S rDNA could be observed at chromosome pair 9 of *H. dispar*.

The hybridization with the 5S rDNA probe revealed signals in one chromosomal pair in most species: *A. micracanthus*, *B. altus*, *C. enoplos*, *C. armatus*, *C. repasson*, *D. hexazona*, *H.*

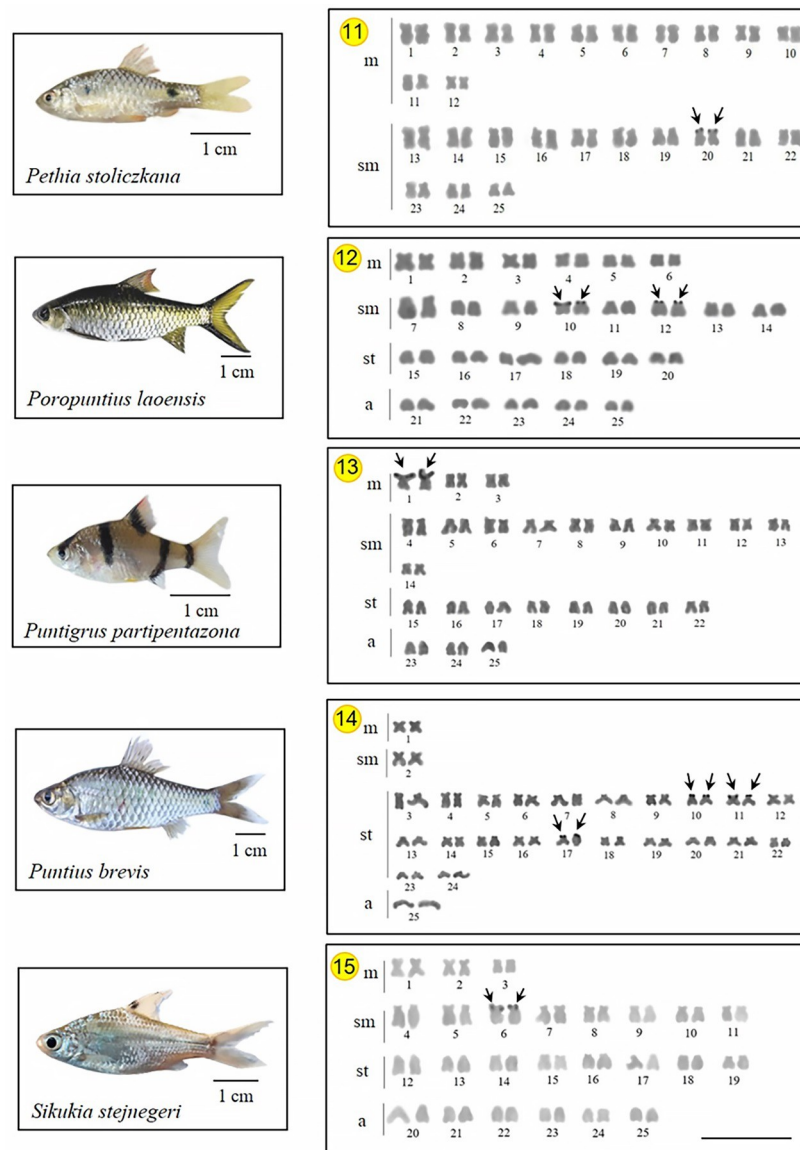

**Fig 4. Karyotypes of five Systomini representatives.** Chromosomes of *Pethia stoliczkana* (11); *Poropuntius laoensis* (12); *Puntigrus partipentazona* (13); *Puntius brevis* (14) and *Sikukia stejneri* (15) arranged in karyotypes from Ag-NOR stain. Arrows indicate NOR-bearing chromosomes. Bar = 5  $\mu$ m.

<https://doi.org/10.1371/journal.pone.0305828.g004>

*dispar*, *P. stoliczkana*, *P. laoensis*, *P. brevis*, and *S. stejneri*. In addition, four other species had remarkably increased the number of chromosomes displaying 5S rDNA sequences, namely *B. schwanenfeldii* with two, *P. partipentazona* with three, *B. gonionotus* with five, and *H. macrolepidota* with six chromosome pairs. Almost all fish species have shown that hybridization signals of 5S rDNA are abundantly distributed in telomeric regions of the short arm.

Pericentromeric regions of chromosome pair 2 of *H. macrolepidota*, pair 2 of *P. stoliczkana*, pair 1 of *P. partipentazona* and pair 1 of *S. stejneri* were also detected by FISH (Figs 5–7 and Table 2). Moreover, the long arms of the chromosome pair 5 in *P. partipentazona* have interstitial signals of the 5S rDNA. In addition, the syntenic arrangement of 5S and 18S rDNAs could



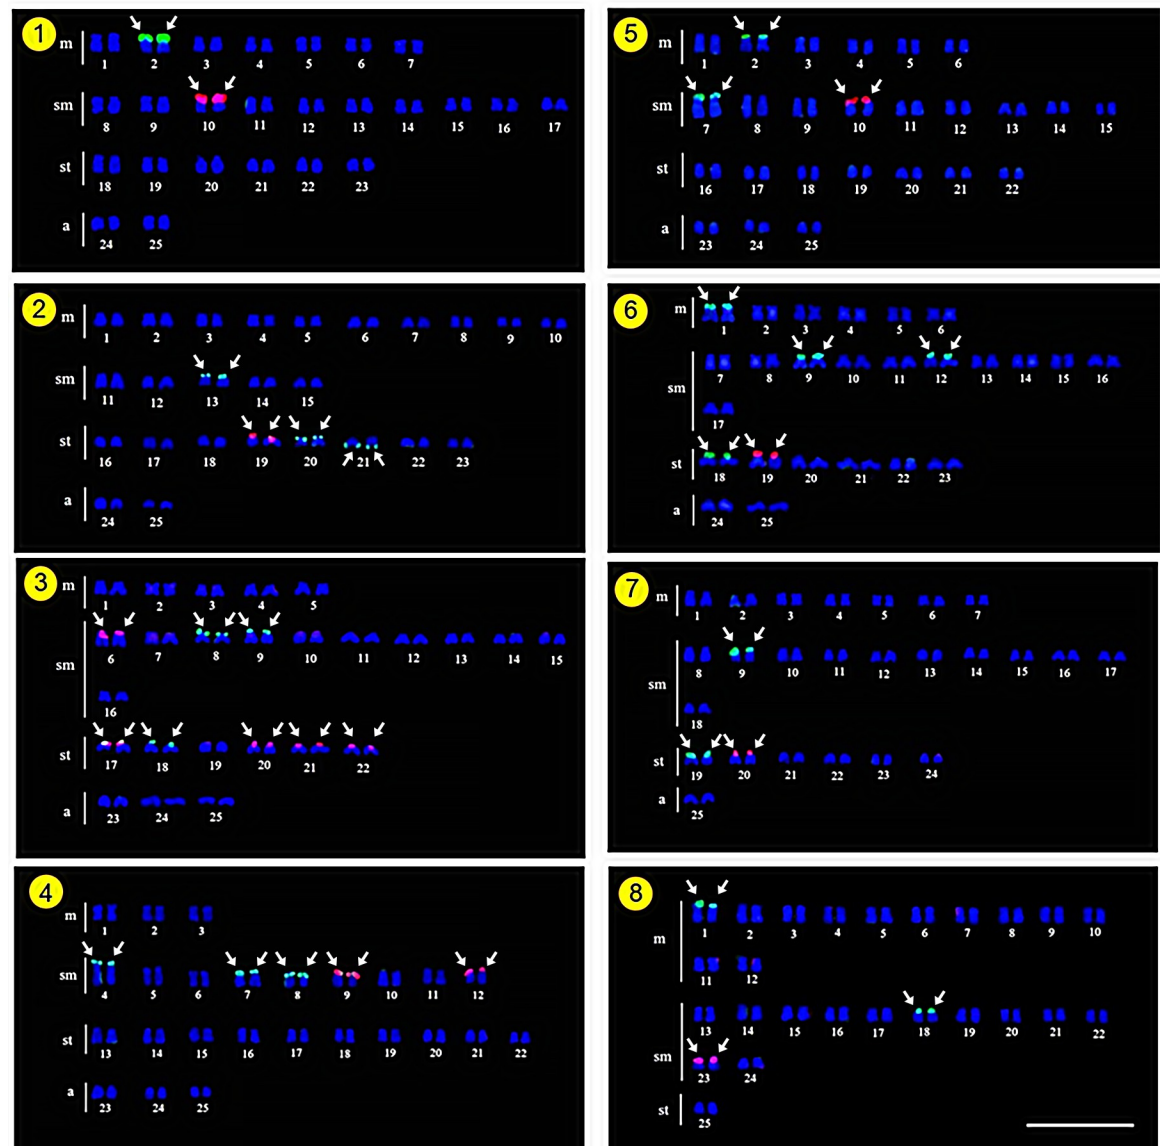

**Fig 5. Karyotypes of Systomini species after double-FISH mapping of rDNA sequences.** Chromosomes of *Amblyrhynchichthys micracanthus* (1); *Barbonymus altus* (2); *B. gonionotus* (3); *B. schwanefeldii* (4); *Cyclocheilichthys armatus* (5); *C. repasson* (6) *Cyclocheilos enoplos* (7) and *Desmopuntius hexazona* (8) arranged after double FISH with 5S (red) and 18S (green) rDNAs. Scale Bar = 5  $\mu$ m.

<https://doi.org/10.1371/journal.pone.0305828.g005>

be observed in *B. gonionotus*. We compiled the distribution of both rDNA probes in cyprinids karyotypes on a comparative idiogram (Fig 7).

## Discussion

### Analysis of karyotypes and Ag-NORs

The use of the 18S rDNA probe confirmed the previous Ag-NOR sites identified of one up to four other sites located in the telomeric regions of distinct chromosomes, characterizing an interspecific variation. Our results showed that the karyotype patterns of 15 fishes in the Systomini tribe are similar to those considered basal and preserved in most Cyprininae. These

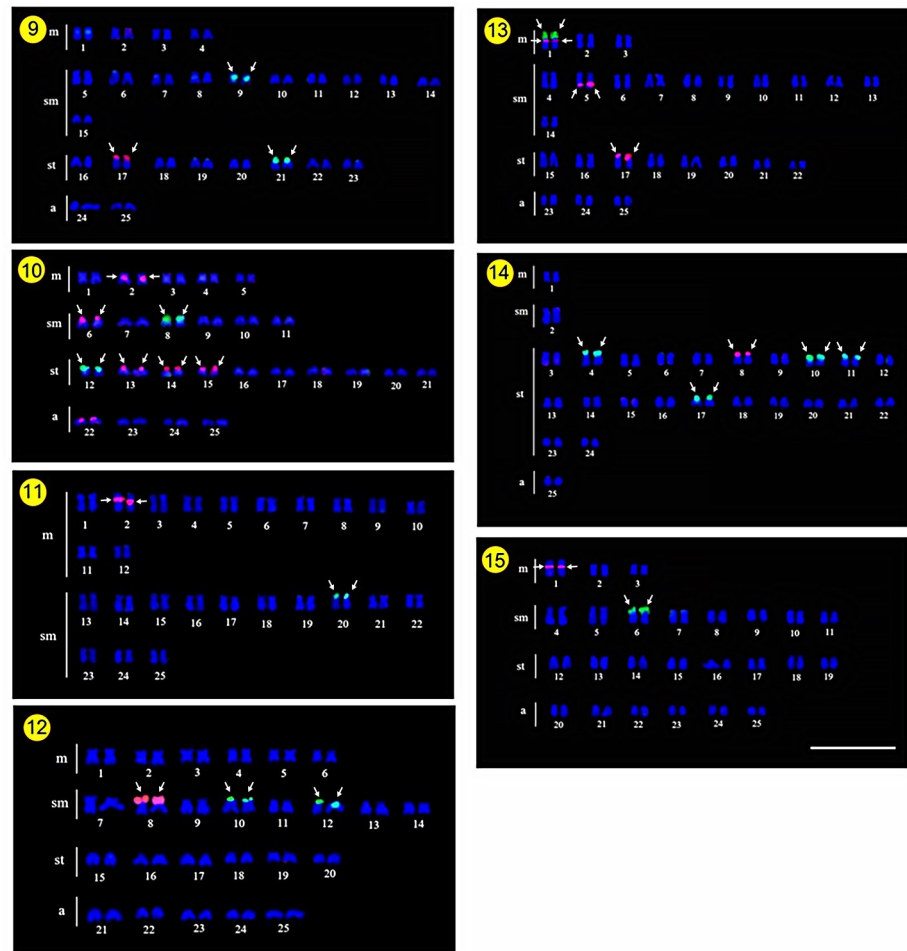

**Fig 6. Karyotypes of Systomini species after double-FISH mapping of rDNA sequences.** *Hampala dispar* (9); *H. macrolepidota* (10); *Pethia stoliczkana* (11); *Poropuntius laoensis* (12); *Puntigrus partipentazona* (13); *Puntius brevis* (14) and *Sikukia stejnegeri* (15) chromosomes arranged after double FISH with 5S (red) and 18S (green) rDNAs as probes. Scale Bar = 5  $\mu$ m.

<https://doi.org/10.1371/journal.pone.0305828.g006>

symplesiomorphies are characterized by a diploid number ( $2n$ ) equal to 50, as also observed for this subfamily in previous reports [23, 36–40], and most Cyprinidae groups [26, 41–43]. Karyotypes of cyprinids are usually composed of all four chromosome classes, mainly of 2–24 metacentric, 2–26 submetacentric, 2–44 subtelocentric, and 2–8 acrocentric chromosomes, without distinguishable sex chromosomes [23, 37, 38, 44–49]. Sex chromosomes may be present but at an early stage of differentiation that cannot be detected by classical cytogenetic analyses [50], or either by FISH mapping with ribosomal sequences as herein shown. Indeed, we couldn't observe cytogenetical differences among sexes.

Homologous Ag-NOR variations are found in the species studied here and these variations are common in fish chromosomes, either representing structural polymorphisms [12] or due to genetic regulation of their ribosomal cistrons [15]. The presence of the heterochromatin in these chromosome regions can promote structural alterations as well as may be an important element in the probable genetic control of these cistrons [51]. Our findings demonstrated that NORs can be detected between 1–4 chromosome pairs (Figs 2–4) in most Systomini fish. The single NOR-bearing chromosome pair in *P. partipentazona* is consistent with previous

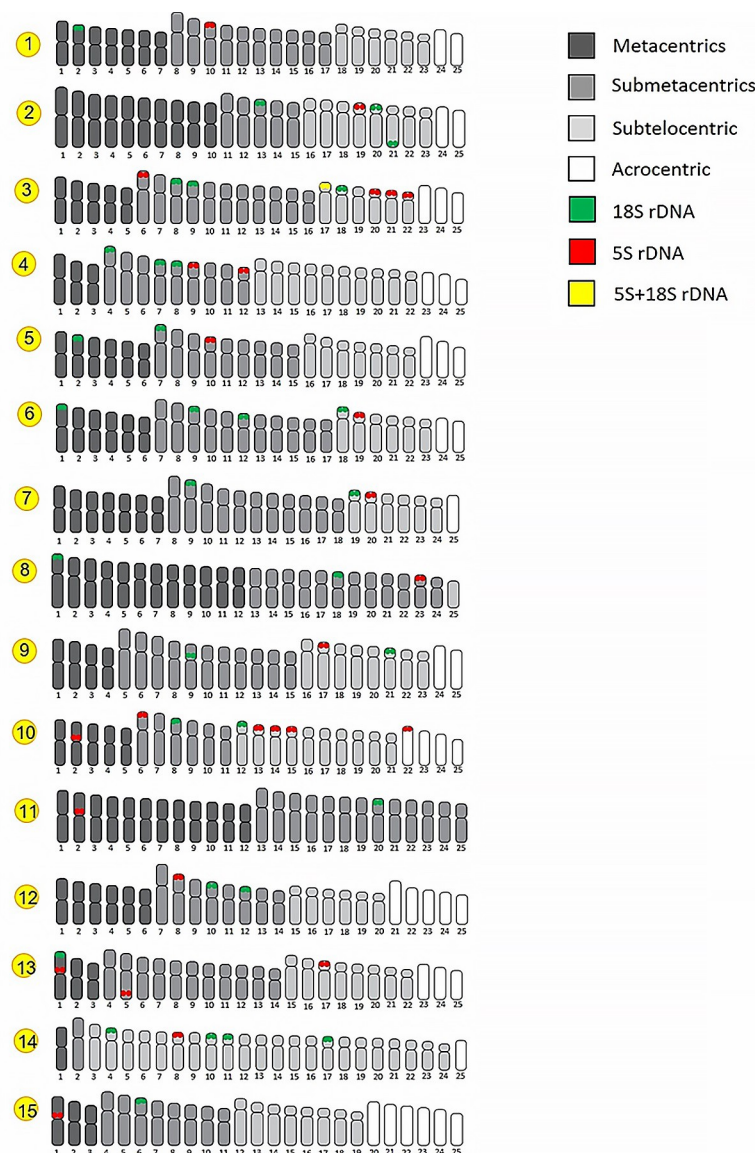

**Fig 7. Representative idiograms of the distribution of rDNA sequences in Systomini.** Each line corresponds to the representation of the haploid set ( $n$ ) of a species, following: *Amblyrhynchichthys micracanthus* (1); *Barbonymus altus* (2); *B. gonionotus* (3); *B. schwanenfeldii* (4); *Cyclocheilichthys armatus* (5); *C. repasson* (6); *Cyclocheilos enoplos* (7); *Desmopuntius hexazona* (8); *Hampala dispar* (9); *H. macrolepidota* (10); *Pethia stoliczkana* (11); *Poropuntius laoensis* (12); *Puntigrus partipentazona* (13); *Puntius brevis* (14); and *Sikukia stejnegeri* (15). Red and green circles indicate the position of 5S and 18S rDNA, respectively.

<https://doi.org/10.1371/journal.pone.0305828.g007>

investigations [41], while the Ag-NOR pattern previously reported for the genus *Barbonymus*, including *B. schwanenfeldii* [52], indicates the NOR exclusive to one pair, which was not equal to the current reported two pairs (Fig 2). Some species had two pairs, including *C. enoplos* [45], and *C. armatus* consistent with the results of Chaiyasan (2018) [23]. Our mapping also revealed three marked pairs in *Puntius brevis*, which is inconsistent with previous studies [53] that reports one pair of NOR at the telomeric region on the short arm of a subtelocentric chromosome. Differences in the number of Ag-NOR and 18S rDNA sites is a common feature of fish karyotypes, as well as in other vertebrates [54, 55]. The nucleolus organizers regions

**Table 2. Cytogenetic and FISH studies on fifteen cyprinids in Thailand (m = metacentric, sm = submetacentric, st = subtelocentric, a = acrocentric chromosomes, NOR = nucleolar organizer region).**

| Species                                | Ag-NOR pair (type)        | rDNA pair (site)                                      |                                     |
|----------------------------------------|---------------------------|-------------------------------------------------------|-------------------------------------|
|                                        |                           | 5S rDNA                                               | 18 rDNA                             |
| <i>Amblyrhynchichthys micracanthus</i> | 2 (m)                     | 10 (telomeric)                                        | 2 (telomeric)                       |
| <i>Barbonymus altus</i>                | 13 (sm), 20 (st)          | 19 (telomeric)                                        | 13, 20, 21 (telomeric)              |
| <i>B. gonionotus</i>                   | 8 (sm), 18 (st)           | 6,17, 20, 21, 22 (telomeric)                          | 8, 9, 17, 18 (telomeric)            |
| <i>B. schwanenfeldii</i>               | 4 (sm), 7 (sm)            | 9, 12 (telomeric)                                     | 4, 7, 8 (telomeric)                 |
| <i>Cyclocheilichthys armatus</i>       | 2 (m), 7 (sm)             | 10 (telomeric)                                        | 2,7 (telomeric)                     |
| <i>C. repasson</i>                     | 1 (m), 9,12 (sm), 18 (st) | 19 (telomeric)                                        | 1, 9, 12, 18 (telomeric)            |
| <i>Cyclocheilos enoplos</i>            | 9 (sm), 19 (st)           | 20 (telomeric)                                        | 9,19 (telomeric)                    |
| <i>Desmopuntius hexazona</i>           | 1 (m), 18 (sm)            | 23 (telomeric)                                        | 1, 18 (telomeric)                   |
| <i>Hampala dispar</i>                  | 9 (sm), 21 (st)           | 17 (telomeric)                                        | 9 (sub-centromeric), 21 (telomeric) |
| <i>H. macrolepidota</i>                | 8 (sm), 12 (a)            | 2 (sub-centromeric), 6, 13, 14, 15, 22 (telomeric)    | 8, 12 (telomeric)                   |
| <i>Pethia stoliczkana</i>              | 20 (sm)                   | 2 (sub-centromeric)                                   | 20 (telomeric)                      |
| <i>Poropuntius laoensis</i>            | 10, 12 (sm)               | 8 (telomeric)                                         | 10, 12 (telomeric)                  |
| <i>Puntigrus partipentazona</i>        | 1 (m)                     | 1 (sub-centromeric), 5 (interstitial), 17 (telomeric) | 1 (telomeric)                       |
| <i>Puntius brevis</i>                  | 10, 11, 17 (a)            | 8 (telomeric)                                         | 4, 10, 11, 17 (telomeric)           |
| <i>Sikukia stejnegeri</i>              | 6 (sm)                    | 1 (sub-centromeric)                                   | 6 (telomeric)                       |

<https://doi.org/10.1371/journal.pone.0305828.t002>

(NORs) represent the location of genes (loci) responsible for ribosome synthesis (18S, 5.8S, and 28S ribosomal RNA). NORs produce a large number of gene expressions and contain more non-histone proteins than any other chromosome region [56]. It is recognized that the appropriate substance that has an affinity for silver and is stained by this element is a collection of nucleolar argentophilic proteins [57–59]. Nevertheless, certain species could have additional argentophilic proteins outside the nucleolar region, which might additionally stain with silver nitrate and impede accurate Ag-NOR identification. Ag-NOR sites have been thoroughly examined in many species of various groups, including fish [60–62], birds [63, 64], frogs [65], and mammals [66, 67], for example. Besides their simple description as a character of the species, the Ag-NORs have been largely utilized in several other investigations, such as comparative and evolutionary studies, identification of sex chromosome systems [68], and phylogenetic relationships [69]. The development of molecular cytogenetic techniques, especially FISH, made significant progress in chromosomal research possible. Here, the quantity and distribution of ribosomal sequences inside chromosomes are demonstrated using appropriate probes designed for this purpose. This approach, however, does not lessen the validity of Ag-NORs identification because it is still a quick and helpful marker to examine the primary rDNA cistrons and to confirm those that were transcriptionally active during the previous cell cycle interphase [70].

### Chromosomal mapping of 18S and 5S rDNAs

The position of both 5S and 18S rDNA sequences on chromosomes was compiled in the idiograms (Fig 7) and Table 2. Although a high variability in the number of chromosomes carrying the 18S rDNA occurred in *B. gonionotus*, *C. repasson* and *P. brevis*, this sequence is highly conserved regarding its position on the other species. On the other hand, the inverse pattern is found in 5S rDNA sites, in which the loci are located in different pairs in representatives of the Systomini. Two species, *P. partipentazona* and *B. gonionotus*, have sequences of both 5S and 18S that appear on the same chromosome. In particular, there is a strong hybridization pattern in *P. partipentazona* for 18S rDNA probe. this same species, both 5S and 18S rDNAs appeared

to be quite conservative and located in the same pair of chromosomes. Moreover, in *B. gonionotus*, some but not all 5S loci are coincident with the 18S rDNA loci. Although Ag-NORs sites are productive cytotaxonomic sites in conservative karyotypes, in some cases rDNA may seem limited to identifying specific differences in its location and frequency, especially among species from families with outstanding chromosomal conservation and hence low evolutionary dynamics [71, 72]. The two most frequently repetitive sequences used in fish chromosomal evolution investigations are the 18S and 5S ribosomal genes [73]. The 5S ribosomal DNA (rDNA) is made up of one transcription unit of around 120 base pairs, and non-transcribed spacer regions (NTS) divide each transcription unit from the next [74]. The 18S rDNA probe hybridized to only one chromosomal pair in several species, namely *A. micracanthus*, *B. altus*, *C. enoplos*, *C. armatus*, *C. repasson*, *D. hexazona*, *H. dispar*, *P. stoliczkana*, *P. laoensis*, *P. brevis* and *S. stejnegeri*. This site is located in the telomeric region of the short arms of that chromosome pair in all species, as also observed in other cyprinids [75]. On other hand, the 5S rDNA probe hybridized in 5, 2, 6, and 3 chromosomes of *B. gonionotus*, *B. schwanenfeldii*, *H. macrolepidota* and *P. partipentazona*, respectively. FISH physical mapping in rare situations has revealed a large distribution of 5S rDNA in most of the chromosomes of some species, especially in families with conservative evolutionary patterns [76].

Ribosomal DNAs (rDNAs) represent an important source of information on genome structure and evolution in several vertebrates [77]. In fish, studies with rDNAs demonstrate the chromosome homologies by identifying syntenic groups conserved or rearranged during karyotype evolution [33, 78, 79]. For example, the results of Rossi (2012) [79] studies suggest that the observed high variability of 5S rDNA loci is an effective tool for investigating karyotype differences in Leuciscinae (Cyprinidae) species with conservative  $2n$ . For the genus *Osteochilus* (Cyprinidae, Labeoninae), although also presenting the conserved pattern for cyprinids of  $2n = 50$ , the investigation of rDNAs and microsatellite motifs demonstrate that extensive chromosomal rearrangements occurred along their evolutionary process [75].

The structure of the karyotype and the mapping of the ribosomal DNA sequence demonstrate the evolutionary dynamics of Systomini karyotypes. We demonstrate that  $2n = 50$  is the common diploid number, following the pattern of Cyprinidae, with variation in the number and position of rDNA sequences. Two species presented a syntenic association of both 5S and 18S rDNAs, an uncommon condition of fish karyotypes. The use of repetitive DNA in combination with other chromosomal analysis procedures is useful for knowledge of the heterochromatic composition of genome and karyotype evolution for a wide variety of fish species, and the results herein described and discussed increased the knowledge on the evolution of the largest freshwater fish family.

## Author Contributions

**Conceptualization:** Pichaya Buasriyot, Weerayuth Supiwong, Alongklod Tanomtong, Marcelo de Bello Cioffi.

**Data curation:** Pichaya Buasriyot, Thomas Liehr.

**Formal analysis:** Pichaya Buasriyot, Francisco de Menezes Cavalcante Sassi, Thomas Liehr, Marcelo de Bello Cioffi.

**Funding acquisition:** Weerayuth Supiwong, Alongklod Tanomtong, Thomas Liehr.

**Investigation:** Nuttasuda Donbundit, Sarawut Kaewsri, Sarun Jumrusthanasan, Kriengkrai Seetapan, Klodthida Yanukun, Nawarat Muanglen.



**Methodology:** Phichaya Buasriyot, Francisco de Menezes Cavalcante Sassi, Nuttasuda Donbundit, Sarawut Kaewsri, Kriengkrai Seetapan, Nawarat Muanglen, Marcelo de Bello Cioffi.

**Project administration:** Weerayuth Supiwong, Alongklod Tanomtong, Marcelo de Bello Cioffi.

**Resources:** Weerayuth Supiwong, Alongklod Tanomtong, Thomas Liehr, Marcelo de Bello Cioffi.

**Supervision:** Weerayuth Supiwong, Krit Pinthong, Alongklod Tanomtong, Thomas Liehr, Marcelo de Bello Cioffi.

**Validation:** Francisco de Menezes Cavalcante Sassi, Weerayuth Supiwong, Kriengkrai Seetapan, Krit Pinthong, Alongklod Tanomtong, Marcelo de Bello Cioffi.

**Visualization:** Phichaya Buasriyot, Francisco de Menezes Cavalcante Sassi, Krit Pinthong, Alongklod Tanomtong, Klodthida Yanukun.

**Writing – original draft:** Phichaya Buasriyot, Francisco de Menezes Cavalcante Sassi, Nuttasuda Donbundit, Sarawut Kaewsri, Sarun Jumruthanasan, Kriengkrai Seetapan, Krit Pinthong, Alongklod Tanomtong, Thomas Liehr.

**Writing – review & editing:** Phichaya Buasriyot, Francisco de Menezes Cavalcante Sassi, Nuttasuda Donbundit, Weerayuth Supiwong, Sarawut Kaewsri, Sarun Jumruthanasan, Kriengkrai Seetapan, Krit Pinthong, Alongklod Tanomtong, Klodthida Yanukun, Nawarat Muanglen, Thomas Liehr, Marcelo de Bello Cioffi.

## References

1. Schofield PJ, Williams JD, Nico LG, Fuller PL, Thomas MR. Foreign Nonindigenous Carps and Minnows (Cyprinidae) in the United States - A Guide to their Identification, Distribution, and Biology. Scientific Investigations Report 2005–5041. 2016;1–104.
2. Howes GJ. Systematics and biogeography: an overview. In: Winfield I. and Nelson J. (Eds), Cyprinid Fishes. Systematic Biology and Exploitation 1991;1–54.
3. Esmaeili HR, Gholami Z. Scanning Electron Microscopy of the scale morphology in Cyprinid fish, *Rutilus frisii kutum* Kamenskii, 1901 (Actinopterygii: Cyprinidae). 2011; 10(1):155–166.
4. Cavender TM. The fossil record of the Cyprinidae. p. 34–54. Geography, Environmental Science. 1991. 3:34–54. [https://doi.org/10.1007/978-94-011-3092-9\\_2](https://doi.org/10.1007/978-94-011-3092-9_2)
5. Vidthayanon C, Karnasuta J, Nabhitabhata J. Diversity of freshwater fishes in Thailand. Office of Environmental Policy and Planning. 1997. Available at: <https://www.fishbase.se/references/FBRefSummary.php?id=26336&lang=thai>. March 18, 2019.
6. Dias AL, Foresti F. Cytogenetic studies on fishes of the family Pimelodidae (Siluroidei). Revista Brasileira de Genetica. 1993; 16(3):585–600.
7. Bertollo LAC, Born GG, Derga-m JA, Fenocchio AS, and Moreira-Filho O. A biodiversity approach in the neotropical Erythrinidae fish, *Hoplias malabaricus*. Karyotypic survey, geographic distribution of cytotypes and cytotaxonomic considerations. Chromosome Research. 2000; 8(7):603–613. <https://doi.org/10.1023/a:1009233907558> PMID: 11117356
8. Paim FG, Nobile MLMO, Foresti F, Oliveira C. Cytogenetic Tools to Study the Biodiversity of Neotropical Fish: From the Classic to the Advent of Cell Culture. Cytogenetics. 2018; <https://doi.org/10.5772/intechopen.80332> Available from: <https://www.intechopen.com/books/cytogenetics-past-present-and-further-perspectives/cytogenetic-tools-to-study-the-biodiversity-of-neotropical-fish-from-the-classic-to-the-advent-of-ce>.
9. Jacobina UP, Affonso PRAM, Carneiro PLS, and Dergam JA, Biogeography and comparative cytogenetics between two populations of *Hoplias malabaricus* (Bloch, 1794) (Ostariophysi: Erythrinidae) from coastal basins in the State of Bahia, Brazil. Neotropical Ichthyology. 2009; 7(4):617–622. <https://doi.org/10.1590/S1679-62252009000400009>
10. Singh RS, Jiang J, Gill BS. Current status and the future of fluorescence in situ hybridization (FISH) in plant genome research. Genome. 2006; 49(9):1057–1068. <https://doi.org/10.1139/g06-076> PMID: 17110986

11. Parra I, Windle B. High resolution visual mapping of stretched DNA by fluorescent hybridization. *Nat Genet.* 1993; 5(1):17–21. <https://doi.org/10.1038/ng0993-17> PMID: 8106079
12. Foresti F, Toledo LFA, Toledo SA. Polymorphic nature of nucleolus organizer regions in fishes. *Cytogenet Cell Genet.* 1981; 31(3):137–44. <https://doi.org/10.1159/000131639> PMID: 6173166
13. Galetti PM, Cesar ACG, Venere PC. Heterochromatin and NORs variability in Leporinus fish (Anostomidae, Characiformes). *Caryologia.* 1991; 44:287–292. <https://doi.org/10.1080/00087114.1991.10797193>
14. Castro MJ, Morales P, Fernández-Soria V, B Súa´rez, MJ Recio, Alvarez M et al. Allelic diversity at the primate Mhc-G locus: exon 3 bears stop codons in all Cercophitecinae sequences. *Immunogenetics.* 1996; 43:327–336. <https://doi.org/10.1007/BF0219980>
15. Galetti PM. Chromosome diversity in neotropical fishes: NOR studies. *Chromosomes of Neotropical Fishes.* 1998; 65:53–56. <https://doi.org/10.1080/11250009809386795>
16. Almeida-Toledo LF, Ozouf-Costaz C, Foresti F, Bonillo C, Porto-Foresti F, Daniel-Silva MFZ. Conservation of the 5S bearing chromosome pair and co-localization with major rDNA clusters in five species of *Astyanax* (Pisces, Characidae). *Cytogenet Genome Res.* 2002; 97:229–233. <https://doi.org/10.1159/000066609> PMID: 12438717
17. Neto CCM, Cioffi MB, Bertollo LAC, Molina WF. Molecular cytogenetic analysis of Haemulidae fish (Perciformes): Evidence of evolutionary conservation. *Journal of Experimental Marine Biology and Ecology.* 2011; 407:97–100. <https://doi.org/10.1016/j.jembe.2011.07.014>
18. Li X, Guo B. Substantially adaptive potential in polyploid cyprinid fishes: evidence from biogeographic, phylogenetic and genomic studies. *Biological Sciences.* 2020;12; 287(1920):20193008. <https://doi.org/10.1098/rspb.2019.3008> PMID: 32075533
19. Hong Y, Zhou T. Studies on the karyotype and C-banding patterns in *Acheilognathus gracilis* with a discussion on the evolution of acheilognathid fishes. *Acta Gen Sinica.* 1985; 12:143–148.
20. Yu XY, Yu XJ. A schizothoracine fish species, *Diptychus dipogon*, with a very high number of chromosomes. *Chromosome Inform Serv.* 1990; 48:17–18.
21. Wolf U, Ritter H, Atkin NB, Ohno S. Polyploidization in the fish family Cyprinidae, order Cypriniformes. *Humangenetik.* 1969; 7:240–244. <https://doi.org/10.1007/BF00273173> PMID: 5800705
22. Sola L, Gornung E. Classical and molecular cytogenetics of the zebrafish, *Danio rerio* (Cyprinidae, Cypriniformes): An overview. *Genetica.* 2001; 111:397–412. <https://doi.org/10.1023/a:1013776323077> PMID: 11841183
23. Chaiyasan P, Supiwong W, Saenjundaeng P, Seetapan K, Pinmongkhonkul S, Tanomtong A. A Report on Classical Cytogenetics of Hihgfin Barb Fish, *Cyclocheilichthys armatus* (Cypriniformes, Cyprinidae). *Cytologia.* 2018; 83:149–154. <https://doi.org/10.1508/cytologia.83.149>
24. Buth DG, Dowling TE, Gold JR. Molecular and cytological investigations. In: Nelson JS, Winfield IJ, editors. *Cyprinid fishes: Systematics, biology and exploitation.* Chapman and Hall; London: 1991; 83–126.
25. Ráb P, Collares-Pereira MJ. Chromosomes of European cyprinid fishes (Cyprinidae, Cypriniformes). *Folia Zool Brno.* 1995; 44:193–214.
26. Yang L, Sado T, Hirt MV, Pasco-Viel E, Arunachalam M, Li J, et al. Phylogeny and polyploidy: Resolving the classification of cyprinine fishes (Teleostei: Cypriniformes). *Mol Phylogenet Evol.* 2015; 85:97–116. <https://doi.org/10.1016/j.ympev.2015.01.014> PMID: 25698355
27. Khensuwan S, de Menezes Cavalcante Sassi F, Rosa de Moraes RL, Rab P, Liehr T, Supiwong W, et al. (2024) Chromosomes of Asian cyprinid fishes: Novel insight into the chromosomal evolution of Labeoninae (Teleostei, Cyprinidae). *PLoS ONE* 19(2): e0292689. <https://doi.org/10.1371/journal.pone.0292689>.
28. Supiwong W, Tanomtong A, Pinthong K, Kaewmad P, Poungnak P, Jangsuwan N. The first chromosomal characteristics of nucleolar organizer regions and karyological analysis of pink anemonefish, *Amphiprion perideraion* (Perciformes, Amphiprioninae). *Cytologia.* 2015; 80:271–278. <https://doi.org/10.1508/cytologia.80.271>
29. Bertollo LAC, Cioffi MB, Moreira-Filho O. Direct chromosome preparation from freshwater teleost fishes. In *Fish Cytogenetic Techniques (Chondrichthyans and Teleosts)*; Ozouf-Costaz, C., Pisano, E., Foresti, F., Almeida Toledo, L.F., Eds.; CRC Press: Boca Raton, FL, USA, 2015;21–26.
30. Howell WM, Black DA. Controlled silver-staining of nucleolus organizer regions with a protective colloidal developer: a 1-step method. *Experientia.* 1980; 36:1014–1015. <https://doi.org/10.1007/BF01953855> PMID: 6160049
31. Supiwong W, Liehr T, Cioffi MB, Chaveerach A, Kosyakova N, Fan X, et al. Comparative cytogenetic mapping of rRNA genes among naked catfishes: implications for genomic evolution in the Bagridae family. *Genetics and Molecular Research.* 2014; 13:9533–9542. <https://doi.org/10.4238/2014.November.12.2> PMID: 25501163

32. Pendás AM, Mórán P, Freije JP, Garcia-Vásquez E. Chromosomal mapping and nucleotide sequence of two tandem repeats of Atlantic salmon 5S rDNA. *Cytogenet Cell Genet*. 1994; 67(1):31–36. <https://doi.org/10.1159/000133792> PMID: 8187548
33. Cioffi MB, Martins C, Centofante L, Jacobina U, Bertollo LAC. Chromosomal variability among allopatric populations of Erythrinidae fish *Hoplias malabaricus*: mapping of three classes of repetitive DNAs. *Cytogenet Genome Res*. 2009; 125:132–141. <https://doi.org/10.1159/000227838> PMID: 19729917
34. Yano CF, Bertollo LAC, Cioffi MB. FISH-FISH: molecular cytogenetics in fish species. In: Liehr T, editor. *Fluorescence in situ hybridization (FISH) - application guide*. 2<sup>nd</sup> ed. Berlin: Springer; 2017;429–443.
35. Levan A, Fredga K, Sandberg AA. Nomenclature for centromeric position on chromosomes. *Hereditas*. 1964; 52:201–220.
36. Donsakul T, Poopitayasathaporn A. Karyotype of Fifteen Species of Cyprinid Fishes (Family Cyprinidae) from Thailand. Research Project. 2002. Srinakharinwirot University, Bangkok.
37. Donsakul T, Magtoon W, Rangsiruji A. Karyological studies of four Cyprinid Fishes: *Barbichthys nitedus*, *Mystacoleucus argenteus*, *Cychocheilichthys lagleri* and *Systomus* sp. from Thailand. In: *Proceedings of the 44th Kasetsart University Annual Conference*, Kasetsart University, Bangkok. 2006;469–476. (In Thai).
38. Seetapan K. Karyotypes of sex fish species of the family Cyprinidae. In: *Proceedings of the 45th Kasetsart University Annual Conference*. Kasetsart University, Bangkok. 2007;749–758. (in Thai).
39. Arai R. *Fish Karyotypes: A Check List*. Springer Japan, Tokyo. 2011. doi: [10.1007/978-4-431-53877-6](https://doi.org/10.1007/978-4-431-53877-6).
40. Supiwong W, Boonsuk J, Jantarat S, Suvarnaksha A, Pengseng P, Tanomtong A. The first chromosomal characteristics of nucleolar organizer regions and karyological analysis of two chaetodontid fishes (Perciformes, Chaetodontidae). *Cytologia*. 2017; 82:33–39.
41. Phimphan S, Chaiyasan P, Suwannapoom C, Reungsing M, Juntaree S, Tanomtong A, et al. Comparative karyotype study of three Cyprinids (Cyprinidae, Cyprininae) in Thailand by classical cytogenetic and FISH techniques. *Comp Cytogenet*. 2020; 14(4):597–612. <https://doi.org/10.3897/CompCytogen.v14i4.54428> PMID: 33384854
42. Donsakul T, Rungsiruji A, Magtoon W. Karyotypes of three species of cyprinid fishes *Garra cambodgiensis*, *G. fasciacauda* and *G. notata* (Cypriniformes, Cyprinidae) from Thailand. *Research & Knowledge*. 2016; 2(2):30–35.
43. Sukham S, Chingakhom B, Thoidingjam L, Waikhom G. Cytogenetic characterization of *Devario aequipinnatus* (McClelland, 1839) and *Devario yuensis* (Arunkumar and Tombi, 1998) (Cypriniformes: Cyprinidae) from Manipur, northeast India. *Turkish Journal of Zoology*. 2013; 37: 706–712.
44. Magtoon W, Arai R. Karyotypes of five *Puntius* species and one *Cyclocheilichthys* species (Pisces, Cyprinidae) from Thailand. *Bulletin of the National Museum of Nature and Science, Series A*. 1989; 15:167–175.
45. Magtoon W, Arai R. Karyotypes and distribution of nucleolus organizer regions in cyprinid fishes from Thailand. *Japanese Journal of Ichthyology*. 1993; 40:77–85.
46. Donsakul T, Magtoon W, Rangsiruji A. Karyotypes of four cyprinid fishes: *Cyclocheilichthys repasson*, *Cosmochilus harmandi*, *Poropuntius deauratus* and *Sikukia gudgei* from Thailand. In: *Proceedings of 43rd Kasetsart University Annual Conference*, Kasetsart University, Bangkok. 2005;344–351. (In Thai).
47. Ueda T, Iijima K, Naoi H, Arai R, Ishinabe T, Jeon SR. Karyotypes of three *Tanakia* bitterlings (Pisces, Cyprinidae) from East Asia. *Cytologia* 2006; 71:251–255.
48. Kaewmad P, Monthatong M, Supiwong W, Saowakoon S, Tanomtong A. Natural autotetraploid and chromosomal characteristics in the subfamily Botiinae (Cypriniformes, Cobitinae) from northeast Thailand. *Cytologia*. 2014; 79:299–313.
49. Sukham S, Chingakhom B, Thoidingjam L, Waikhom G, Kumar R, Kushwaha B. A cytogenetical study on *Barilius ngawa*, *Vishwanath* and *Manojkumar*, 2002 (Cypriniformes: Cyprinidae) from Northeast India, Manipur. *International Journal of Fisheries and Aquaculture*. 2014; 4:58–62.
50. Na-Nakorn U, Lakaanantakun A. Comparison between the performance of diploid and triploid *Clarias macrocephalus*. *BIOTROP Spec. Publ*. 1993; 52:79–86.
51. Galetti PM, Cesar A, Venere PC. Heterochromatin and NORs variability in *Leporinus* fish (Anostomidae, Characiformes). *Caryologia*. 2014; 44(3–4):287–292.
52. Chantapan T. Standardized karyotype and ideogram of cyprinid fishes (Subfamily: Cyprininae) in Thailand. M.Sc. Thesis. Khon Kaen University. 2015.
53. Nitikulwopawong N, Khruanet V. Karyotypic of Golden Little Barb, *Puntius brevis* Bleeker, 1850 (Pisces: Cyprinidae) from Khon Kaen Province. Khon Kean University. *Journal of Science*. 2014;42 (1):106–118. [In Thai].

54. Supiwong W, Tanomtong A, Jumrusthanasan S, Khakhong S, Leelarasamee K, Sanoamuang L. A first karyotype analysis and chromosomal characteristic of nucleolar organizer regions (NORs) of common sheathfish, *Micronema apogon* (Siluriformes, Siluridae) in Thailand. *Cytologia*. 2012; 77(1):53–58. <https://doi.org/10.1508/cytologia.77.53>
55. Supiwong W, Liehr T, Cioffi MB, Chaveerach A, Kosyakova N, Pinthong K, et al. Karyotype and cytogenetic mapping of 9 classes of repetitive DNAs in the genome of the naked catfish *Mystus bocourti* (Siluriformes, Bagridae). *Molecular Cytogenetics*. 2013; 6(1):1–51. <https://doi.org/10.1186/1755-8166-6-51> PMID: 24266901
56. Long EO, David ID. Repeated genes in eukaryotes. *Annual Review of Biochemistry*. 1980; 49:727–764. <https://doi.org/10.1146/annurev.bi.49.070180.003455> PMID: 6996571
57. Goessens G. Nucleolar Structure. *International Review of Cytology*. 1984(87):107–158. [https://doi.org/10.1016/s0074-7696\(08\)62441-9](https://doi.org/10.1016/s0074-7696(08)62441-9) PMID: 6201455
58. Hernández-Verdún D, Fakan S. The nucleolus and the nucleolar organizer regions. *Biology of the cell*. 1986; 56(3):189–205. <https://doi.org/10.1111/j.1768-322x.1986.tb00452.x> PMID: 2943350
59. Dobigny G, Ozouf-Costaz C, Bonillo C, Volobouev V. “Ag-NORs” are not always true NORs: New evidence in mammals. *Cytogenet Genome Res*. 2002; 98:75–77. <https://doi.org/10.1159/000068541> PMID: 12584445
60. Phillips RB, Ihssen PE. Chromosome banding in salmonid fishes: nucleolar organizer regions in *Salmo* and *Salvelinus*. *Can J Genet Cytol*. 1985; 27:433–440. <https://doi.org/10.1139/g85-064> PMID: 4027775
61. Garcia C, Filho OM. Cytogenetical analyses in three fish species of the genus *Pimelodus* (Siluriformes: Pimelodidae) from rio São Francisco: considerations about the karyotypical evolution in the genus. *Neotropical Ichthyology*. 2005; 3(2). <https://doi.org/10.1590/S1679-62252005000200006>
62. Supiwong W, Getlakha N, Chaiphech S, Pinthong K, Phimphan S, Tanomtong A. Nucleolar Organizer Regions Polymorphism and Karyological Analysis of Black Lancer, *Bagrichthys majusculus* (Siluriformes, Bagridae) in Thailand. *Cytologia*. 2018; 83(2):193–199.
63. Nishida-Umehara C, Tsuda Y, Ishijima J, Ando J, Fujiwara A, Matsuda Y, et al. The molecular basis of chromosome orthologies and sex chromosomal differentiation in palaeognathous birds. *Chromosome Research*. 2007; 15:721–734. <https://doi.org/10.1007/s10577-007-1157-7> PMID: 17605112
64. Kretschmer R, Ferguson-Smith MA, Oliveira EHC. Karyotype evolution in birds: from conventional staining to chromosome painting. 2018; 9(4):181. <https://doi.org/10.3390/genes9040181> PMID: 29584697
65. Sangpakdee W, Phimphan S, Tengjaroenkul B, Pinthong K, Neeratanaphan L, Tanomtong A. Cytogenetic Study of Three Microhylid Species (Anura, Microhylidae) from Thailand. *Cytologia*. 2017; 82(1): 67–74.
66. Souza MJ, Yonenaga-Yassuda Y. Chromosomal variability of sex chromosomes and NOR's in *Trichomys apereoides* (Rodentia, Echimyidae). *Cytogenetics and Cell Genetics*. 1982; 33(3):197–203. <https://doi.org/10.1159/000131755> PMID: 7128212
67. Arslan A, Akan S, Zima J. Variation in C-heterochromatin and NOR distribution among chromosomal races of mole rats (Spalacidae) from Central Anatolia, Turkey. *Mammalian Biology*. 2011; 76:28–35.
68. Rocha-Reis DA, Oliveira BK, Almeida-Toledo LF, Pazza R, Kavalco KF. The Persevering Cytotaxonomy: Discovery of a Unique XX/XY Sex Chromosome System in Catfishes Suggests the Existence of a New, Endemic and Rare Species. *Cytogenetic and Genome Research*. 2018; 156:45–55. <https://doi.org/10.1159/000492959> PMID: 30261510
69. Amemiya CT, GOLD JR. Cytogenetic studies in North American minnows (Cyprinidae): Chromosomal NOR phenotypes of 12 species, with comments on cytosystematic relationships among 50 species. *Hereditas*. 1990; 112:231–247. <https://doi.org/10.1111/j.1601-5223.1990.tb00062.x>
70. Pession A, Farabegoli F, Treré D, Novello F, Montanaro L, Sperti S, et al. The Ag-NOR proteins and transcription and duplication of ribosomal genes in mammalian cell nucleoli. *Chromosoma*. 1991; 100(4):242–250. <https://doi.org/10.1007/BF00344158> PMID: 1711437
71. Neto CCM, Lima-Filho PA, Ara'Ujo WC, Bertollo LAC, Molina WF. Differentiated evolutionary pathways in Haemulidae (Perciformes): karyotype stasis versus morphological differentiation. *Reviews in Fish Biology and Fisheries*. 2012; 22(2):457–465.
72. Molina WF, Martinez PA, Bertollo LAC, Bidau CJ. Evidence for meiotic drive as an explanation for karyotype changes in fishes. *Marine Genomics*. 2014; 15:29–34. <https://doi.org/10.1016/j.margen.2014.05.001> PMID: 24844732
73. Gornung E. Twenty years of physical mapping of major ribosomal RNA genes across the teleosts: a review of research. *Cytogenetic and Genome Research*. 2013; 141(2–3):90–102. <https://doi.org/10.1159/000354832> PMID: 24080951

74. Rebordinos L, Cross I, Merlo A. High Evolutionary Dynamism in 5S rDNA of Fish: State of the Art. *Cytogenetic and Genome Research*. 2013; 141:103–113. <https://doi.org/10.1159/000354871> PMID: [24080995](#)
75. Saenjundaeng P, Supiwong W, Sassi FMC, Bertollo LAC, Rab P, Kretschmer R, et al. Chromosomes of Asian cyprinid fishes: Variable karyotype patterns and evolutionary trends in the genus *Osteochilus* (Cyprinidae, Labeoninae, “Osteochilini”). *Genetics and Molecular Biology*. 2020; 43(4): Article Number e20200095. <https://doi.org/10.1590/1678-4685-GMB-2020-0195>.
76. Affonso RADM, Fernandes MA, Almeida JS, Molina WF. Sequential steps of chromosomal differentiation in Atlantic surgeonfishes: evolutionary inferences. *The Scientific World Journal*. 2014: Article ID 825703, 7 pages. <https://doi.org/10.1155/2014/825703> PMID: [25197714](#)
77. Biémont C, Vieira C. Genetics: Junk DNA as an evolutionary force. *Nature*. 2006; 443:521–524. <https://doi.org/10.1038/443521a> PMID: [17024082](#)
78. Cioffi MB, Martins C, Bertollo LAC. Chromosome spreading of associated transposable elements and ribosomal DNA in the fish *Erythrinus erythrinus*. Implications for genome change and karyoevolution in fish. *BMC Evol Biol*. 2010; 10:271.
79. Rossi AR, Milana V, Hett AK, Tancioni L. Molecular cytogenetic analysis of the Appenine endemic cyprinid fish *Squalius lucumonis* and three other Italian leuciscines using chromosome banding and FISH with rDNA probes. *Genetica*. 2012; 140:469–476. <https://doi.org/10.1007/s10709-012-9695-0> PMID: [23238894](#)
